# Supplementary material for: Pt(ii) mono-carbonyl complexes of a cyclometallating 2-(2′-thienyl)-(pyridinato-C,3N′) ligand: nature and dynamics of the lowest excited state of the chloro- and thiolato-complexes
Source: Royal Society of Chemistry journal article supplement (doi:10.1039/b502375k), 2005-01-01

## Electronic Supplementary Information

### Pt(II) mono-carbonyl complexes of a cyclometallating 2-(2'-thienyl)-pyridinato-C,<sup>3</sup>N') ligand: nature and dynamics of the lowest excited state of the chloro- and thiolato- complexes

*Yurii A. Kovalenkov, Alexander J. Blake, Michael W. George\*, Pavel Matousek,*

*Mikhail Ya. Mel'nikov, Anthony W. Parker, Xue-Zhong Sun, Michael Towrie and*

*Julia A. Weinstein\**

#### Figure ESI-1.

Quenching of emission of Pt(thpy)(CO)Cl by benzyl viologen tetrafluoroborate (denoted as BzV<sup>2+</sup>) in deoxygenated CH<sub>3</sub>CN at room temperature. The plot represents linear dependence of  $\tau_0/\tau$  vs. the concentration of the quencher, [BzV<sup>2+</sup>], where  $\tau_0$  is emission lifetime without the quencher. The rate constant of the bimolecular emission quenching,  $k_Q$ , of  $7 \times 10^9 \text{ dm}^3 \text{ mol}^{-1} \text{ s}^{-1}$  was determined from this plot using Stern-Volmer equation  $\tau_0/\tau = 1 + \tau_0 k_Q [\text{BzV}^{2+}]$ .

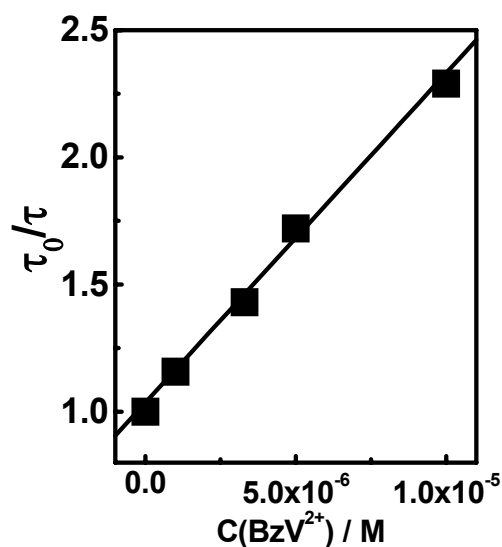

Supplement: b502375k.pdf [file b502375k.pdf]
